# Supplementary material
Source: MDPI journal article supplement (https://www.mdpi.com/search?q=sustainability-12-01259)
Supplement: s001 [file sustainability-12-01259-s001.pdf]

Im Rahmen der Begleitforschung des Spitzencluster Bioeconomy wurde eine Methode zur Erstellung von produktbezogenen Sozialbilanzen (social LCA) entwickelt. Social LCA analysiert und bewertet, soziale Nachhaltigkeitsaspekte von Produkten und Unternehmen. Mit der folgenden Befragung sollen sozio-ökonomische Aspekte in ihrem Unternehmen erhoben werden, als Grundlage zur Erstellung einer produktbezogenen Sozialbilanz (social LCA) im Rahmen einer Bachelorarbeit.

Ansprechpartnerin: Lena Jarosch  
Telefon: 01712789350  
Emailadresse: lena.jarosch@ufz.de  
Sitz: DBFZ, Haus 7.0  
Raum: 306

Ihre Antworten werden streng vertraulich behandelt und in anonymisierter Form ausgewertet.

## 1. Personalstruktur

1.1. Wie viele Beschäftigte hat Ihr Unternehmen aufgegliedert nach den genannten Beschäftigungsverhältnissen?

| Gruppe                                           | Männer                                       | Frauen |
|--------------------------------------------------|----------------------------------------------|--------|
| Gesamt                                           |                                              |        |
| Sozialversicherungspflichtige Beschäftigte       | Arbeiter/innen und Angestellte               |        |
|                                                  | Auszubildende                                |        |
| Nicht sozialversicherungspflichtige Beschäftigte | Geringfügig Beschäftigte (bis 450 €)         |        |
|                                                  | Beamte                                       |        |
| davon atypische Beschäftigung                    | Befristete Beschäftigte (an Gesamt)          |        |
|                                                  | Leiharbeiter                                 |        |
|                                                  | Teilzeit Beschäftigte ( $\leq 31$ h / Woche) |        |

1.2. Wie verteilen sich die Beschäftigten auf die hier genannten Beschäftigungsgruppen?

| Gruppe                                                                                    | Männer | Frauen |
|-------------------------------------------------------------------------------------------|--------|--------|
| Einfache Tätigkeiten, die keine Berufsausbildung erfordern                                |        |        |
| Qualifizierte Tätigkeiten, die Berufsausbildung oder erhebliche Berufserfahrung erfordern |        |        |
| Qualifizierte Tätigkeiten, die einen Hochschul- oder Fachhochschulabschluss erfordern     |        |        |
| Qualifizierte Tätigkeiten, tätige Inhaber/innen, Vorstände, Geschäftsführer/innen         |        |        |

## 2. Gesundheitsschutz

2.1 Welche folgenden Maßnahmen zum Schutz oder zur Förderung der Gesundheit der Beschäftigten, die über die gesetzlichen Regelungen hinausgehen, werden in Ihrem Unternehmen durchgeführt oder finanziell unterstützt?  
(Mehrfachnennungen sind möglich)

|                                                                                                                                                  | Ja                       | Nein                     |
|--------------------------------------------------------------------------------------------------------------------------------------------------|--------------------------|--------------------------|
| A Krankenstandanalyse                                                                                                                            | <input type="checkbox"/> | <input type="checkbox"/> |
| B Mitarbeiterbefragung zum Gesundheitsschutz am Arbeitsplatz                                                                                     | <input type="checkbox"/> | <input type="checkbox"/> |
| C Gesprächskreise zu gesundheitlichen Problemen im Betrieb („Gesundheitszirkel“)                                                                 | <input type="checkbox"/> | <input type="checkbox"/> |
| D Innerbetriebliche Aktivitäten (z.B. aktive Pausengestaltung, Betriebssport, Gesundheitstage, Gesundheitschecks, physiotherapeutische Angebote) | <input type="checkbox"/> | <input type="checkbox"/> |
| E Schulung oder Beratungsangebote für Beschäftigte (z.B. Suchtproblematik, psychischen Problemen oder zu Ernährungsthemen)                       | <input type="checkbox"/> | <input type="checkbox"/> |
| F Finanzielle Unterstützung außerbetrieblicher Angebote zur Gesundheitsförderung                                                                 | <input type="checkbox"/> | <input type="checkbox"/> |
| G Netzwerk zum betrieblichen Gesundheitsmanagement (z.B. Kooperation mit den Krankenkassen)                                                      | <input type="checkbox"/> | <input type="checkbox"/> |
| Sonstiges: <input type="text"/>                                                                                                                  |                          |                          |

2.2 Wie viele Arbeitsunfälle hatte Ihr Unternehmen im vergangenen Jahr zu verzeichnen?  
(Angabe möglichst in „Pro 1000 Vollarbeiter“, wenn zutreffend bitte ankreuzen)

|                                                |                                                |
|------------------------------------------------|------------------------------------------------|
| <input type="checkbox"/> Pro 1000 Vollarbeiter | Sonstiges: <input type="text"/>                |
| Anzahl gesamt: <input type="text"/>            | Anzahl tödlicher Unfälle: <input type="text"/> |

2.3 Wie viele Krankheitsstunden bzw. -tage hatte Ihr Unternehmen im vergangenen Jahr zu verzeichnen?

|                                                                                                      |                                 |
|------------------------------------------------------------------------------------------------------|---------------------------------|
| <input type="checkbox"/> Pro 1000 Vollarbeiter                                                       | Sonstiges: <input type="text"/> |
| <input type="checkbox"/> Stunden Anzahl / <input type="checkbox"/> Anzahl Tage: <input type="text"/> |                                 |

### 3. Personalpolitik

3.1 Wie hoch war Ihre durchschnittliche Einstellungsquote in den vergangenen drei Jahren?

Quote:  % Anmerkung:

3.2 Beschäftigt ihr Unternehmen Frauen in Management-Positionen?

- a) 1. Führungsebene:  Ja  Nein (Geschäftsführerin, Eigentümerin, Vorstand)  
 b) 2. Führungsebene:  Ja  Nein

3.3 Welche der folgenden Maßnahmen zur Vereinbarkeit von Beruf und Familie und zur Förderung der Chancengleichheit von Frauen und Männern bietet Ihr Unternehmen an?  
 (Mehrfachnennungen sind möglich)

- |                                                                                                                                                             | Ja                       | Nein                     |
|-------------------------------------------------------------------------------------------------------------------------------------------------------------|--------------------------|--------------------------|
| A Unterstützung bei der Kinderbetreuung (z.B. Betriebskindergarten, Kooperation mit Kindergärten, Kinderbetreuung in den Ferien, finanzielle Unterstützung) | <input type="checkbox"/> | <input type="checkbox"/> |
| B Unterstützung für Beschäftigte mit pflegebedürftigen Angehörigen (z.B. Kooperation mit Pflegeheimen, Beratungsstellen, Informationsangebote)              | <input type="checkbox"/> | <input type="checkbox"/> |
| C Besondere Rücksichtnahme auf Beschäftigte mit Betreuungspflichten bei der Arbeitszeitgestaltung (z.B. flexible Arbeitszeitkonten, Teilzeitmodelle)        | <input type="checkbox"/> | <input type="checkbox"/> |
| D Angebote an Beschäftigte, die wegen Elternzeit freigestellt sind (z.B. Weiterbildung)                                                                     | <input type="checkbox"/> | <input type="checkbox"/> |
| E Gezielte Förderung von Frauen (z.B. Mentoringprogramme, Frauenförderpläne, spezielle Weiterbildung, Zielvereinbarung zur Erhöhung des Frauenanteils)      | <input type="checkbox"/> | <input type="checkbox"/> |
| F Mitglied in einem Netzwerk familienfreundlicher Betriebe                                                                                                  | <input type="checkbox"/> | <input type="checkbox"/> |
| G Andere Maßnahmen: <input type="text"/>                                                                                                                    |                          |                          |

3.4 Welche der folgenden Maßnahmen gibt es in Ihrem Unternehmen für ältere Arbeitnehmer ab 50 Jahren?  
 (Mehrfachnennungen sind möglich)

- |                                                                       | Ja                       | Nein                     |
|-----------------------------------------------------------------------|--------------------------|--------------------------|
| A Altersteilzeit                                                      | <input type="checkbox"/> | <input type="checkbox"/> |
| B Besondere Ausstattung der Arbeitsplätze                             | <input type="checkbox"/> | <input type="checkbox"/> |
| C Individuelle Anpassung der Leistungs- und Arbeitsanforderungen      | <input type="checkbox"/> | <input type="checkbox"/> |
| D Altersgemischte Besetzung von Arbeitsgruppen                        | <input type="checkbox"/> | <input type="checkbox"/> |
| E Einbeziehung Älterer in die betrieblichen Weiterbildungsaktivitäten | <input type="checkbox"/> | <input type="checkbox"/> |
| F Spezielle Weiterbildungsangebote für Ältere                         | <input type="checkbox"/> | <input type="checkbox"/> |
| G Einbeziehung Älterer in Maßnahmen zur Gesundheitsförderung          | <input type="checkbox"/> | <input type="checkbox"/> |
| H Andere Maßnahmen für Ältere: <input type="text"/>                   |                          |                          |

3.5 Beschäftigen Sie Menschen aus folgenden sozialen Gruppen in Ihrem Unternehmen? (Mehrfachnennungen sind möglich)

- |                                                                                                        |        |                      |
|--------------------------------------------------------------------------------------------------------|--------|----------------------|
| <input type="checkbox"/> Menschen mit Behinderung                                                      | Anzahl | <input type="text"/> |
| <input type="checkbox"/> Menschen mit Migrationshintergrund                                            | Anzahl | <input type="text"/> |
| <input type="checkbox"/> Ehemals Langzeitarbeitslose (länger als 12 Monate ohne Lohnarbeit)            | Anzahl | <input type="text"/> |
| <input type="checkbox"/> Geringqualifizierte (Menschen ohne Ausbildung, bzw. max. Hauptschulabschluss) | Anzahl | <input type="text"/> |
| <input type="checkbox"/> Berufsrückkehrer (nach Kindererziehung oder Pflege)                           | Anzahl | <input type="text"/> |

Anmerkung:

3.6 Inwiefern fördert Ihr Unternehmen Fort- und Weiterbildungsmaßnahmen?

- Freistellung der Mitarbeiter bzw. Kostenübernahme vom Arbeitgeber

3.7 Wie wurde in Ihrem Unternehmen im Jahr 2018 an Fort- und Weiterbildungsmaßnahmen teilgenommen?

(Zutreffende Felder ausfüllen bzw. ankreuzen, d ≙ Tage, h ≙ Stunden, Fall ≙ Maßnahme)

| Gruppe                | Gesamt               |                      |                                                         | davon Frauen         |                      |                                                         |
|-----------------------|----------------------|----------------------|---------------------------------------------------------|----------------------|----------------------|---------------------------------------------------------|
|                       | Mitarbeiter          | Fälle                | <input type="checkbox"/> d / <input type="checkbox"/> h | Mitarbeiter          | Fälle                | <input type="checkbox"/> d / <input type="checkbox"/> h |
| Ohne Berufsausbildung | <input type="text"/> | <input type="text"/> | <input type="text"/>                                    | <input type="text"/> | <input type="text"/> | <input type="text"/>                                    |
| Mit Berufsausbildung  | <input type="text"/> | <input type="text"/> | <input type="text"/>                                    | <input type="text"/> | <input type="text"/> | <input type="text"/>                                    |

3.8 Erfüllt Ihr Betrieb die bestehenden gesetzlichen Voraussetzungen zur Berufsausbildung? (falls nein, weiter mit 4.1.)  
 Ja  Nein Sonstiges: \_\_\_\_\_

3.9 Wie viele Ausbildungsplätze haben Sie in den letzten drei Jahren durchschnittlich pro Ausbildungsjahr angeboten?  
 Anzahl gesamt: \_\_\_\_\_

3.10 Wie viele besetzte Ausbildungsplätze hatten Sie durchschnittlich in den letzten drei Jahren?  
 Anzahl gesamt: \_\_\_\_\_

3.11 Wie viele der Auszubildenden haben Sie nach ihrer Lehre übernommen?  
 Anzahl gesamt: \_\_\_\_\_

**5. Löhne und Gehälter**

3.12 Wie werden die Beschäftigten in Ihrem Unternehmen bezahlt? Nach...

- Branchentarifvertrag: \_\_\_\_\_
- einem zwischen dem Betrieb und den Gewerkschaften geschlossener Haustarif- oder Firmenvertrag
- kein Tarifvertrag Falls für Ihren Betrieb ein Tarifvertrag gilt, weiter mit 4.5.

3.13 Orientieren Sie sich hinsichtlich der Löhne und Gehälter an einem Branchentarifvertrag?

- Ja  Nein Sonstiges: \_\_\_\_\_

3.14 Wenn Sie den gültigen Tarifvertrag zugrunde legen: Zahlen Sie Löhne und Gehälter über Tarif?

- Ja  Nein Sonstiges: \_\_\_\_\_

3.15 Wenn ja, um wie viel Prozent liegen die Löhne und Gehälter bei Ihnen im Durchschnitt über dem Tarif?  
 ca. \_\_\_\_\_ %

3.16 Wie hoch war bei Ihnen die gesamte Bruttolohn- und Gehaltssumme für den Monat März 2019?  
 (Ohne Arbeitgeberanteil zur Sozialversicherung und ohne Urlaubsgeld/Weihnachtsgeld)

\_\_\_\_\_ €

3.17 Wie hoch war der/das höchste, niedrigste und am häufigsten gezahlte Bruttolohn/-gehalt in Ihrem Unternehmen im Monat März 2019?

| Gruppe          | Männer | Frauen |
|-----------------|--------|--------|
| Höchste in €    |        |        |
| Niedrigste in € |        |        |
| Häufigste in €  |        |        |

**4. Arbeitszeiten**

4.1. Wie lang ist die derzeitig vereinbarte durchschnittliche Arbeitszeit für einen Vollzeitbeschäftigten?

Wöchentliche Arbeitszeit: \_\_\_\_\_ Stunden pro Woche

4.2. Wie werden Überstunden ausgeglichen?

- Ausgleich mit Freizeit oder finanziellem Ausgleich
- nur Freizeit
- nur finanzieller Ausgleich
- kein Ausgleich

4.3. Bietet ihr Unternehmen flexible Arbeitszeiten für die Beschäftigten an?

- ja
- wir planen solche anzubieten
- nein

**7. Mitbestimmung & Beteiligung**

3.18 Gibt es in Ihrem Unternehmen einen nach dem Betriebsverfassungsgesetz bzw. Personalvertretungsgesetz gewählten Betriebsrat oder Personalrat?

- Ja  Nein Sonstiges: \_\_\_\_\_

3.19 Wie oft machte der Betriebsrat von seinem Mitbestimmungsrecht nach §87 BetrVG im Jahr 2018 gebrauch?

Anzahl gesamt: \_\_\_\_\_ Anmerkung: \_\_\_\_\_

3.20 Gibt es in Ihrem Unternehmen eine andere betriebsspezifische Form der Mitarbeitervertretung wie z.B. einen Belegschaftssprecher, einen runden Tisch oder Ähnliches?

Ja  Nein Anmerkung: \_\_\_\_\_

3.21 Durch welche sonstigen Maßnahmen werden Mitarbeiter in Ihre Unternehmenstätigkeit einbezogen?

\_\_\_\_\_

3.22 Können sich Ihre Mitarbeiter finanziell am Erfolg Ihres Unternehmens beteiligen?

Ja  Nein Und zwar durch: \_\_\_\_\_

3.23 Können sich Anwohner finanziell am Erfolg Ihres Unternehmens beteiligen?

Ja  Nein Und zwar durch: \_\_\_\_\_

3.24 Welche Maßnahmen treffen Sie, um externe Stakeholder (Anwohner, Kommunen, NGOs) einzubinden (z.B. Informationsveranstaltungen, Tag der offenen Tür etc.)?

\_\_\_\_\_

3.25 Gibt es in Ihrem Unternehmen ein Beschwerdemanagement für externe Stakeholder und wenn ja wie haben sich Beschwerdefälle in den letzten drei Jahren entwickelt?

|        | 2016 | 2017 | 2018 |
|--------|------|------|------|
| Gesamt |      |      |      |
| Lärm   |      |      |      |
| Luft   |      |      |      |
| Stoffe |      |      |      |

Sonstiges: \_\_\_\_\_

3.26 Engagiert sich Ihr Unternehmen im sozialen Bereich (z.B. durch Spenden, Bildungsprojekte etc.) und wenn ja in welcher Form?

\_\_\_\_\_

## 9. Forschung & Entwicklung

6.1. Wie hoch war Ihr Anteil an Forschungs- und Entwicklungsausgaben im letzten Jahr gemessen am Umsatz?

Quote: \_\_\_\_\_ %

7.1 Wie viele Mitarbeiter in ihrem Unternehmen sind ausschließlich oder zeitweise mit Forschung und Entwicklungsaufgaben beschäftigt?

a) ca. \_\_\_\_\_ Beschäftigte arbeiten ausschließlich in der Forschung

b) ca. \_\_\_\_\_ Beschäftigte arbeiten zeitweise in der Forschung

## 10. Region

7.1. Wie hoch ist der Anteil der Mitarbeiter mit Wohnort in 150 km Umkreis von Ihrem Standort?

ca. \_\_\_\_\_ %

7.2. Wie viele Ihrer Zulieferer kommen aus der Region? (150 km Umkreis)

Zulieferer gesamt: \_\_\_\_\_ Zulieferer aus der Region: \_\_\_\_\_

Sonstiges: \_\_\_\_\_

7.3. Wie viel Prozent Ihrer Materialinputs kommen aus der Region? (150 km Umkreis)

Ungefähre Quote: \_\_\_\_\_ %

Sonstiges: \_\_\_\_\_

## 11. Allgemeine Angaben zu Ihrem Unternehmen

8.1. Bitte ordnen Sie Ihr Unternehmen in die Kategorien ein:

- |                                             |                                                        |
|---------------------------------------------|--------------------------------------------------------|
| <input type="checkbox"/> < 10 Beschäftigte  | <input type="checkbox"/> ≤ 2 Mio.€ jährl. Umsatzerlös  |
| <input type="checkbox"/> < 50 Beschäftigte  | <input type="checkbox"/> ≤ 10 Mio.€ jährl. Umsatzerlös |
| <input type="checkbox"/> < 250 Beschäftigte | <input type="checkbox"/> ≤ 50 Mio.€ jährl. Umsatzerlös |
| <input type="checkbox"/> < 500 Beschäftigte | <input type="checkbox"/> ≥ 50 Mio.€ jährl. Umsatzerlös |
| <input type="checkbox"/> > 500 Beschäftigte |                                                        |

**Ansprechpartner/-in bei ggf. Nachfragen**

Organisation:

Ansprechpartner/-in:

E-Mail:

Telefon:

Einverständnis zur Speicherung und Verarbeitung von Kontaktdaten

- Ja, ich bin damit einverstanden, dass meine Kontaktdaten für den Zweck der Nachfrage oder gespeichert und verarbeitet werden.
- Nein, ich bin damit nicht einverstanden.

Die Kontaktdaten werden bis Ende des Jahres gespeichert.

Ihre Kontaktdaten werden für Dritte unzugänglich gespeichert. Selbstverständlich können Sie einer Speicherung Ihrer Kontaktdaten zu jedem Zeitpunkt widersprechen. Der Widerruf ist zu richten an: E-Mail: [lena.jarosch@ufz.de](mailto:lena.jarosch@ufz.de)

\_\_\_\_\_  
Vorname, Nachname in Druckschrift

\_\_\_\_\_  
Ort, Datum / Unterschrift

Haben Sie Interesse an der Erstellung einer produktbezogenen Sozialbilanz für eines Ihrer Produkte?

- ja       eventuell       nein

Ihre weiteren Anmerkungen:

Bei Rückfragen wenden Sie sich bitte an den Kontakt auf Seite 1.

*Vielen Dank für Ihre Mitarbeit!*
